# Supplementary material for: Increasing the Environmental Sustainability of Greenhouse Vegetable Production by Combining Biochar Application and Drip Fertigation—Effects on Soil N2O Emissions and Carbon Sequestrations
Source: MDPI journal article supplement (doi:10.3390/agronomy12071661), 2022-07-12
Supplement: s1 [file s1]

## Supplementary Materials

**Table S1.** Growth duration; transplanting and final harvest dates of tomato cultivation; amount of mineral nitrogen, phosphate, potassium and organic fertiliser application; number of irrigation events and total amounts of irrigation water for different seasons in drip fertigation systems.

| Seasons and years   | Duration   | Date of        |               | Chicken manure        | Mineral Nitrogen      | Phosphate                                         | Potassium                            | Total N application   | Irrigation quantity | Number of irrigation events    |
|---------------------|------------|----------------|---------------|-----------------------|-----------------------|---------------------------------------------------|--------------------------------------|-----------------------|---------------------|--------------------------------|
|                     | days       | Trans-planting | Final harvest | kg N ha <sup>-1</sup> | kg N ha <sup>-1</sup> | kg P <sub>2</sub> O <sub>5</sub> ha <sup>-1</sup> | kg K <sub>2</sub> O ha <sup>-1</sup> | kg N ha <sup>-1</sup> | mm                  | Frequency season <sup>-1</sup> |
| 2016WS              | 122        | 11.03.16       | 10.07.16      | 200                   | 220                   | 90                                                | 320                                  | 420                   | 380                 | 62                             |
| 2016AW              | 153        | 25.08.16       | 24.01.17      | 200                   | 190                   | 80                                                | 270                                  | 390                   | 390                 | 62                             |
| 2017WS              | 121        | 25.02.17       | 25.06.17      | 200                   | 180                   | 80                                                | 260                                  | 380                   | 350                 | 58                             |
| 2017AW              | 164        | 25.08.17       | 05.02.18      | 200                   | 200                   | 80                                                | 290                                  | 400                   | 380                 | 70                             |
| 2018WS              | 116        | 07.03.18       | 30.06.18      | 200                   | 194                   | 86                                                | 312                                  | 394                   | 355                 | 61                             |
| 2018AW              | 159        | 25.08.18       | 31.01.19      | 200                   | 175                   | 78                                                | 283                                  | 375                   | 275                 | 66                             |
| 2019WS              | 131        | 25.02.19       | 07.07.19      | 200                   | 159                   | 71                                                | 257                                  | 359                   | 241                 | 53                             |
| 2019AW              | 158        | 25.08.19       | 30.01.19      | 200                   | 180                   | 80                                                | 260                                  | 380                   | 370                 | 60                             |
| 2016                | 275        |                |               | 400                   | 410                   | 170                                               | 590                                  | 810                   | 770                 | 124                            |
| 2017                | 285        |                |               | 400                   | 380                   | 160                                               | 650                                  | 780                   | 730                 | 128                            |
| 2018                | 275        |                |               | 400                   | 369                   | 164                                               | 595                                  | 769                   | 630                 | 127                            |
| 2019                | 289        |                |               | 400                   | 339                   | 151                                               | 517                                  | 739                   | 611                 | 113                            |
| <b>Seasons mean</b> | <b>141</b> |                |               | <b>200</b>            | <b>187</b>            | <b>81</b>                                         | <b>281</b>                           | <b>387</b>            | <b>343</b>          | <b>62</b>                      |
| <b>Annual mean</b>  | <b>281</b> |                |               | <b>400</b>            | <b>375</b>            | <b>161</b>                                        | <b>588</b>                           | <b>775</b>            | <b>685</b>          | <b>123</b>                     |

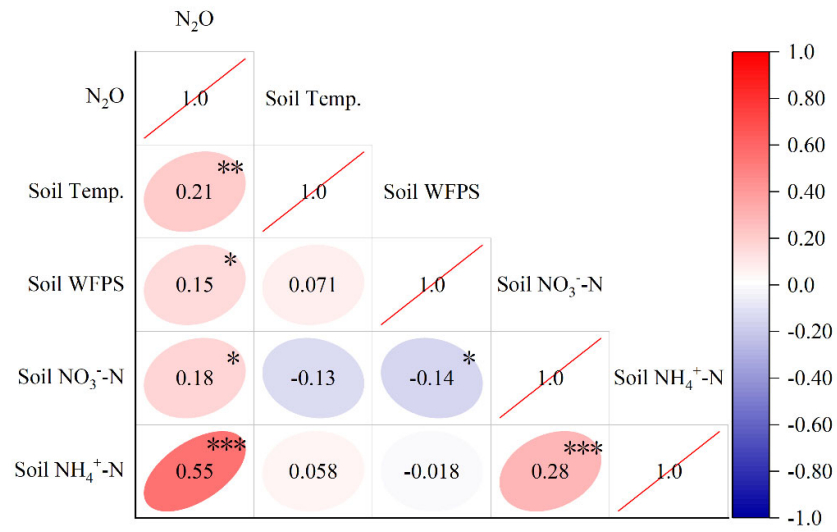

**Figure S1.** Pearson's correlation between daily N<sub>2</sub>O emissions and daily mean values of soil temperature, soil water-filled pore space (WFPS) and soil mineral N concentration (NO<sub>3</sub><sup>-</sup>-N and NH<sub>4</sub><sup>+</sup>-N). For this analysis, all daily observation data obtained during the growing seasons 2018WS, 2018AS and 2019WS were used. \*, \*\* and \*\*\* indicate  $P < 0.05$ ,  $P < 0.01$ , and  $P < 0.001$ , respectively. N = 208.
